# Supplementary material for: Evidence for Network-Based Cortical Thickness Reductions in Schizophrenia
Source: Atypon-hosted journal article supplement (doi:10.1176/appi.ajp.2019.18040380), 2019-06-05
Supplement: appi.ajp.2019.18040380.ds001.pdf [file appi.ajp.2019.18040380.ds001.pdf]

## Supplementary Materials

### *Participants*

#### *First-episode psychosis*

Seventy-three individuals experiencing a first episode psychosis (FEP) were recruited from Orygen Youth Health's Early Psychosis Prevention and Intervention Centre (EPPIC), Melbourne, Australia between 1995-1999. FEP-specific inclusion criteria were; (1) current DSM-IIIa(1) Axis I diagnosis of a psychotic disorder; and (2) less than 6 months of neuroleptic treatment. The current study also excluded FEP patients with a primary mood diagnosis. The Royal Park Multidiagnostic Instrument for Psychosis (RPMIP)(2) and the Structured Diagnostic Interview for DSM-III (SCID-I/P)(3) were used to determine diagnosis. Further information about the methodology has been described previously(4). Healthy control (HC) participants ( $N = 57$ ) were recruited from the same catchment area as patients. HCs with a history of psychiatric illness were excluded. Exclusion criteria for FEP and HC included: significant head injury and/or loss of consciousness for  $> 1$  minute; preferred language other than English; known history of learning disability; DSM diagnosis of substance abuse or dependence; neurological disease; baseline age  $>30$ . Current IQ was measured using four subtests of the Wechsler Adult Intelligence Scale (WAIS) – Revised (5) and premorbid IQ was estimated using the National Adult Reading Test (6). Ethics approval was obtained from the Human Research and Ethics Committees of the North Western Mental Health Program, the Victorian Department of Human Services, the Australian Institute of Health and Welfare, and relevant area mental health services. All participants provided informed consent and had adequate English comprehension. For the purposes of the current study, FEP patients receiving treatment with clozapine ( $n = 3$ ) were also excluded.

#### *Chronic schizophrenia*

Data from 153 individuals with chronic schizophrenia and 168 healthy control subjects were obtained from the Australian Schizophrenia Research Banks (ASRB), a register of research data collected by scientific collaborators across five Australian sites, between 2007-2011. ASRB exclusion criteria for participants included: i) a history of organic brain disorder, ii) electroconvulsive therapy in the previous 6 months, iii) current substance dependence, iv) movement disorders, or v) brain injury

with post-traumatic amnesia. Healthy controls with a personal or family history of psychosis or bipolar I disorder were also excluded. Detailed information regarding the consent procedures have been published previously (7). The Diagnostic Interview for Psychosis (8) was used to obtain clinical symptom ratings and confirm patient diagnoses according to ICD-10 or DSM-IV criteria. Study procedures were approved by the Melbourne Health Human Research Ethics Committee. For the purposes of the current study, chronic patients receiving treatment with clozapine (n = 37) were also excluded.

#### *Treatment-resistant schizophrenia*

Forty-seven individuals with TRS were recruited from inpatient and outpatient clinics in Melbourne, Australia between 2012-2017. Treatment resistance was defined as at least two unsuccessful trials of two or more different antipsychotic types and currently taking clozapine (9, 10). Inclusion criteria for the TRS group included a diagnosis of schizophrenia, aged 18-65 years, illness duration >5 years, and currently prescribed and taking clozapine. Fifty-four healthy control participants with similar socioeconomic and educational background were recruited from the general community. The Mini International Neuropsychiatric Interview (MINI)(11) was used to confirm a diagnosis of schizophrenia in individuals with TRS, and to rule out current or past psychopathology in healthy controls. The study was approved by the Melbourne Health Human Research Ethics Committee (MHREC ID 2012.069); and all participants provided written informed consent prior to participation.

## *Methods*

### ***Clinical measures***

In FEP patients, current IQ was measured using four subtests of the Wechsler Adult Intelligence Scale – Revised (WAIS-R; Wechsler, 1981) and premorbid IQ was estimated using the National Adult Reading Test (6). In CSZ and TRS patients, current IQ was measured using the 2-subtest short form (Vocabulary and Matrix Reasoning) of the WAIS-III (12) and premorbid IQ was estimated using the Wechsler Test of Adult Reading (13). In CSZ and TRS patients, negative symptoms were assessed using the Scale for the Assessment of Negative Symptoms (SANS)(14). In CSZ patients, positive symptoms were measured using the hallucinations and delusions items from the Diagnostic Interview for Psychosis (DIP)(8). In FEP and TRS patients, positive and negative symptoms were assessed using the Positive and Negative Syndrome Scale (PANSS) (15).

### ***Imaging data acquisition***

#### *FEP*

Magnetic resonance images were acquired using a General Electric Medical Systems 1.5T Signa scanner. T1-weighted images comprised 124 coronal slices of 1.5mm thickness. Imaging parameters were as follows: echo time = 3.3 milliseconds; repetition time = 14.3 milliseconds; flip angle = 30°; matrix size = 256 × 256; field of view = 240 × 240 mm<sup>2</sup>; and voxel dimensions, 0.94 × 0.94 × 1.5 mm<sup>3</sup>.

#### *CSZ*

T1-weighted (MPRAGE) structural scans were acquired using Siemens Avanto 1.5T scanners located at five different sites in Australia. The same acquisition sequence was used at each site and a Siemens phantom was periodically imaged at each site to

evaluate potential inter-site differences. T1-weighted images comprised 176 sagittal slices of 1 mm thickness without gap; field of view =  $250 \times 250 \text{ mm}^2$ ; repetition time = 1980 ms, echo time = 4.3 ms; data matrix size =  $256 \times 256$ ; voxel dimensions =  $1.0 \times 1.0 \times 1.0 \text{ mm}^3$ .

### *TRS*

Magnetic resonance images were acquired using a Siemens Avanto 3T Magnetom TIM Trio scanner. T1-weighted images were acquired using an optimized Magnetization-Prepared Rapid Acquisition Gradient Echo (MPRAGE) sequence. The sequence parameters were: 176 sagittal slices of 1 mm thickness without gap, field of view =  $250 \times 250 \text{ mm}^2$ , repetition time = 1980 ms, echo time = 4.3 ms, flip angle =  $15^\circ$ , using an acquisition matrix of  $256 \times 256$  resulting in a final reconstructed voxel resolution of  $0.98 \times 0.98 \times 1.0 \text{ mm}^3$ .

Table S1. Medication information

|                                | FEP (n = 70) | CSZ (n = 153) | TRS (n = 47) |
|--------------------------------|--------------|---------------|--------------|
| Medications (% using)          |              |               |              |
| Amitriptyline hydrochloride    |              |               | 4.26         |
| Amulsipride                    |              | 15.03         | 4.26         |
| Aripiprazole                   |              | 13.73         | 8.51         |
| Chlorpromazine                 | 25.71        |               |              |
| Clozapine                      |              |               | 100.00       |
| Flupenthixol decanoate         |              | 1.31          |              |
| Fluphenazine decanoate         | 1.43         | 1.96          |              |
| Haloperidol                    | 2.86         | 0.65          |              |
| Haloperidol decanoate          |              | 1.96          |              |
| Olanzapine                     | 11.43        | 32.68         | 8.51         |
| Paliperidone                   |              |               | 6.38         |
| Paliperidone palmitate         |              |               | 2.13         |
| Quetiapine fumerate            | 1.43         | 21.57         | 2.13         |
| Risperidone                    | 51.43        | 12.42         | 4.26         |
| Risperidone consta             |              | 9.15          | 4.26         |
| Thioridazine hydrochloride     | 1.43         | 0.65          |              |
| Trifluoperazine hydrochloride  | 2.86         | 3.27          |              |
| Ziprasidone hydrochloride      |              | 2.61          |              |
| Zuclopenthixol decanoate       |              | 3.92          | 2.13         |
| Zuclopenthixol dihydrochloride |              | 0.65          |              |

## Results

Table S2. Regions of significant cortical thinning in first-episode psychosis patients ranked by effect size

| Hemisphere | Region                                                                 | Patients |      | Controls |      | <i>t</i> -statistic | Effect size<br>(Cohen's <i>d</i> ) |
|------------|------------------------------------------------------------------------|----------|------|----------|------|---------------------|------------------------------------|
|            |                                                                        | Mean     | SD   | Mean     | SD   |                     |                                    |
| Right      | Superior temporal sulcus                                               | 2.40     | 0.12 | 2.50     | 0.14 | 4.68                | 0.42                               |
| Right      | Middle occipital gyrus (O2, lateral occipital gyrus)                   | 2.52     | 0.17 | 2.68     | 0.20 | 4.56                | 0.41                               |
| Left       | Anterior occipital sulcus                                              | 2.13     | 0.17 | 2.27     | 0.24 | 4.15                | 0.37                               |
| Left       | Precentral sulcus (superior part)                                      | 2.22     | 0.14 | 2.34     | 0.18 | 4.09                | 0.37                               |
| Right      | Inferior frontal sulcus                                                | 2.32     | 0.16 | 2.42     | 0.16 | 3.60                | 0.32                               |
| Right      | Intraparietal sulcus and transverse parietal sulci                     | 2.00     | 0.12 | 2.08     | 0.15 | 3.44                | 0.31                               |
| Left       | Circular sulcus of the insula (inferior segment)                       | 2.70     | 0.20 | 2.80     | 0.19 | 3.32                | 0.30                               |
| Right      | Precentral sulcus (inferior part)                                      | 2.32     | 0.16 | 2.41     | 0.15 | 3.29                | 0.29                               |
| Left       | Superior temporal gyrus (planum temporale)                             | 2.45     | 0.19 | 2.57     | 0.20 | 3.28                | 0.29                               |
| Left       | Precuneus                                                              | 2.47     | 0.15 | 2.56     | 0.16 | 3.24                | 0.29                               |
| Right      | Anterior occipital sulcus and preoccipital notch                       | 2.20     | 0.22 | 2.31     | 0.25 | 3.17                | 0.28                               |
| Left       | Intraparietal sulcus and transverse parietal sulci                     | 2.06     | 0.11 | 2.13     | 0.15 | 3.17                | 0.28                               |
| Right      | Postcentral sulcus                                                     | 1.99     | 0.13 | 2.06     | 0.13 | 3.16                | 0.28                               |
| Right      | Superior frontal sulcus                                                | 2.41     | 0.18 | 2.50     | 0.15 | 3.13                | 0.28                               |
| Right      | Cingulate sulcus (marginal branch)                                     | 2.15     | 0.16 | 2.23     | 0.14 | 3.13                | 0.28                               |
| Right      | Precentral sulcus (superior part)                                      | 2.20     | 0.16 | 2.29     | 0.18 | 3.11                | 0.28                               |
| Right      | Medial occipito-temporal sulcus (collateral sulcus) and lingual sulcus | 2.15     | 0.17 | 2.25     | 0.21 | 3.08                | 0.28                               |
| Left       | Superior temporal sulcus                                               | 2.38     | 0.11 | 2.44     | 0.12 | 2.97                | 0.27                               |
| Right      | Lateral occipito-temporal sulcus                                       | 2.31     | 0.24 | 2.43     | 0.21 | 2.89                | 0.26                               |
| Left       | Medial occipito-temporal sulcus (collateral sulcus) and lingual sulcus | 2.24     | 0.16 | 2.32     | 0.18 | 2.87                | 0.26                               |
| Left       | Superior parietal lobule                                               | 2.23     | 0.15 | 2.32     | 0.18 | 2.84                | 0.25                               |
| Left       | Angular gyrus                                                          | 2.53     | 0.22 | 2.65     | 0.25 | 2.80                | 0.25                               |
| Right      | Circular sulcus of the insula (inferior segment)                       | 2.66     | 0.20 | 2.76     | 0.21 | 2.79                | 0.25                               |
| Right      | Inferior temporal sulcus                                               | 2.37     | 0.18 | 2.46     | 0.19 | 2.78                | 0.25                               |
| Right      | Inferior frontal gyrus (opercular part)                                | 2.70     | 0.24 | 2.82     | 0.20 | 2.78                | 0.25                               |
| Right      | Circular sulcus of the insula (superior segment)                       | 2.68     | 0.18 | 2.76     | 0.17 | 2.67                | 0.24                               |
| Left       | Postcentral sulcus                                                     | 2.02     | 0.12 | 2.09     | 0.15 | 2.67                | 0.24                               |
| Left       | Inferior frontal sulcus                                                | 2.34     | 0.13 | 2.40     | 0.15 | 2.66                | 0.24                               |
| Left       | Lateral occipito-temporal sulcus                                       | 2.36     | 0.21 | 2.46     | 0.22 | 2.66                | 0.24                               |
| Right      | Middle frontal sulcus                                                  | 2.34     | 0.15 | 2.42     | 0.15 | 2.61                | 0.23                               |
| Right      | Cingulate gyrus and sulcus (middle-posterior part)                     | 2.60     | 0.18 | 2.68     | 0.19 | 2.60                | 0.23                               |

---

|       |                                                      |      |      |      |      |      |      |
|-------|------------------------------------------------------|------|------|------|------|------|------|
| Left  | Middle occipital gyrus (O2, lateral occipital gyrus) | 2.52 | 0.19 | 2.60 | 0.19 | 2.59 | 0.23 |
| Right | Circular sulcus of the insula (anterior segment)     | 2.81 | 0.27 | 2.94 | 0.29 | 2.57 | 0.23 |
| Right | Subparietal sulcus                                   | 2.32 | 0.23 | 2.42 | 0.22 | 2.57 | 0.23 |

---

Table S3. Regions of significant cortical thinning in chronic schizophrenia patients ranked by effect size

| Hemisphere | Region                                                                 | Patients |      | Controls |      | <i>t</i> -statistic | Effect size (Cohen's <i>d</i> ) |
|------------|------------------------------------------------------------------------|----------|------|----------|------|---------------------|---------------------------------|
|            |                                                                        | Mean     | SD   | Mean     | SD   |                     |                                 |
| Right      | Orbital gyri                                                           | 2.86     | 0.18 | 2.97     | 0.19 | 5.26                | 0.29                            |
| Left       | Orbital gyri                                                           | 2.81     | 0.18 | 2.92     | 0.18 | 5.07                | 0.28                            |
| Right      | Temporal pole                                                          | 3.35     | 0.24 | 3.48     | 0.23 | 4.79                | 0.27                            |
| Right      | Superior temporal gyrus (lateral aspect)                               | 3.11     | 0.19 | 3.21     | 0.19 | 4.75                | 0.27                            |
| Left       | Superior temporal gyrus (lateral aspect)                               | 3.06     | 0.20 | 3.17     | 0.19 | 4.58                | 0.26                            |
| Right      | Circular sulcus of the insula (superior segment)                       | 2.53     | 0.14 | 2.59     | 0.14 | 4.54                | 0.25                            |
| Left       | Superior temporal sulcus (parallel sulcus)                             | 2.44     | 0.12 | 2.50     | 0.12 | 4.46                | 0.25                            |
| Right      | Circular sulcus of the insula (anterior segment)                       | 2.77     | 0.23 | 2.88     | 0.24 | 4.45                | 0.25                            |
| Left       | Temporal pole                                                          | 3.30     | 0.23 | 3.43     | 0.21 | 4.43                | 0.25                            |
| Right      | Inferior frontal gyrus (opercular part)                                | 2.78     | 0.18 | 2.87     | 0.18 | 4.32                | 0.24                            |
| Left       | Superior temporal gyrus (planum polare)                                | 3.42     | 0.33 | 3.56     | 0.27 | 4.18                | 0.23                            |
| Left       | Medial occipito-temporal sulcus (collateral sulcus) and lingual sulcus | 2.25     | 0.16 | 2.33     | 0.15 | 4.17                | 0.23                            |
| Left       | Inferior temporal sulcus                                               | 2.45     | 0.18 | 2.54     | 0.18 | 4.14                | 0.23                            |
| Right      | Orbital sulci (H-shaped sulci)                                         | 2.65     | 0.20 | 2.75     | 0.22 | 4.13                | 0.23                            |
| Left       | Inferior temporal gyrus                                                | 3.07     | 0.18 | 3.16     | 0.17 | 4.05                | 0.23                            |
| Left       | Circular sulcus of the insula (anterior segment)                       | 2.77     | 0.24 | 2.88     | 0.23 | 4.02                | 0.23                            |
| Left       | Middle frontal sulcus                                                  | 2.28     | 0.14 | 2.34     | 0.16 | 4.01                | 0.22                            |
| Left       | Inferior frontal gyrus (triangular part)                               | 2.71     | 0.20 | 2.78     | 0.18 | 3.95                | 0.22                            |
| Right      | Superior temporal sulcus (parallel sulcus)                             | 2.51     | 0.13 | 2.56     | 0.12 | 3.95                | 0.22                            |
| Left       | Parahippocampal gyrus                                                  | 3.05     | 0.25 | 3.16     | 0.24 | 3.92                | 0.22                            |
| Right      | Inferior frontal sulcus                                                | 2.31     | 0.12 | 2.36     | 0.14 | 3.92                | 0.22                            |
| Left       | Medial orbital sulcus (olfactory sulcus)                               | 2.30     | 0.22 | 2.38     | 0.21 | 3.88                | 0.22                            |
| Left       | Precentral sulcus (inferior part)                                      | 2.43     | 0.13 | 2.49     | 0.14 | 3.88                | 0.22                            |
| Right      | Precentral sulcus (inferior part)                                      | 2.44     | 0.12 | 2.49     | 0.15 | 3.87                | 0.22                            |
| Left       | Middle temporal gyrus                                                  | 3.13     | 0.16 | 3.21     | 0.19 | 3.85                | 0.22                            |
| Left       | Middle frontal gyrus                                                   | 2.71     | 0.15 | 2.78     | 0.16 | 3.83                | 0.21                            |
| Left       | Posterior-dorsal part of the cingulate gyrus                           | 2.95     | 0.20 | 3.02     | 0.17 | 3.80                | 0.21                            |
| Right      | Superior temporal gyrus (planum temporale)                             | 2.59     | 0.20 | 2.68     | 0.20 | 3.79                | 0.21                            |
| Right      | Middle temporal gyrus                                                  | 3.20     | 0.18 | 3.27     | 0.17 | 3.77                | 0.21                            |
| Left       | Inferior occipital gyrus and sulcus                                    | 2.41     | 0.19 | 2.48     | 0.19 | 3.68                | 0.21                            |
| Left       | Inferior frontal gyrus (orbital part)                                  | 2.81     | 0.28 | 2.93     | 0.24 | 3.65                | 0.20                            |
| Right      | Straight gyrus, Gyrus rectus                                           | 2.61     | 0.20 | 2.70     | 0.23 | 3.59                | 0.20                            |



|       |                                                                        |      |      |      |      |      |      |
|-------|------------------------------------------------------------------------|------|------|------|------|------|------|
| Right | Sulcus intermedius primus (of Jensen)                                  | 2.31 | 0.20 | 2.40 | 0.20 | 3.58 | 0.20 |
| Right | Medial occipito-temporal sulcus (collateral sulcus) and lingual sulcus | 2.24 | 0.16 | 2.29 | 0.15 | 3.58 | 0.20 |
| Left  | Circular sulcus of the insula (superior segment)                       | 2.52 | 0.15 | 2.57 | 0.14 | 3.54 | 0.20 |
| Right | Inferior frontal gyrus (triangular part)                               | 2.76 | 0.18 | 2.83 | 0.21 | 3.52 | 0.20 |
| Right | Inferior temporal gyrus                                                | 3.09 | 0.18 | 3.16 | 0.17 | 3.41 | 0.19 |
| Right | Superior frontal gyrus                                                 | 2.91 | 0.15 | 2.97 | 0.18 | 3.34 | 0.19 |
| Left  | Short insular gyri                                                     | 3.56 | 0.26 | 3.68 | 0.25 | 3.28 | 0.18 |
| Right | Transverse frontopolar gyri and sulci                                  | 2.65 | 0.19 | 2.73 | 0.20 | 3.28 | 0.18 |
| Left  | Transverse temporal sulcus                                             | 2.30 | 0.28 | 2.42 | 0.33 | 3.25 | 0.18 |
| Right | Posterior ramus of the lateral sulcus                                  | 2.43 | 0.16 | 2.48 | 0.16 | 3.25 | 0.18 |
| Right | Anterior cingulate gyrus and sulcus                                    | 2.69 | 0.15 | 2.76 | 0.17 | 3.17 | 0.18 |
| Left  | Subcentral gyrus (central operculum) and sulci                         | 2.69 | 0.19 | 2.76 | 0.18 | 3.03 | 0.17 |
| Left  | Anterior transverse collateral sulcus                                  | 2.53 | 0.30 | 2.64 | 0.30 | 3.01 | 0.17 |
| Left  | Middle-anterior cingulate gyrus and sulcus                             | 2.67 | 0.17 | 2.73 | 0.17 | 2.99 | 0.17 |
| Right | Short insular gyri                                                     | 3.54 | 0.26 | 3.64 | 0.33 | 2.97 | 0.17 |
| Right | Circular sulcus of the insula (inferior segment)                       | 2.70 | 0.21 | 2.76 | 0.20 | 2.96 | 0.17 |
| Right | Superior temporal gyrus (planum polare)                                | 3.28 | 0.26 | 3.35 | 0.26 | 2.95 | 0.17 |
| Right | Inferior occipital gyrus and sulcus                                    | 2.63 | 0.20 | 2.69 | 0.20 | 2.90 | 0.16 |
| Left  | Inferior frontal gyrus (opercular part)                                | 2.77 | 0.17 | 2.83 | 0.19 | 2.89 | 0.16 |
| Left  | Anterior cingulate gyrus and sulcus                                    | 2.72 | 0.16 | 2.78 | 0.20 | 2.85 | 0.16 |
| Right | Middle-anterior cingulate gyrus and sulcus (aMCC)                      | 2.74 | 0.17 | 2.80 | 0.17 | 2.85 | 0.16 |
| Left  | Lateral occipito-temporal gyrus (fusiform gyrus)                       | 2.77 | 0.16 | 2.83 | 0.17 | 2.84 | 0.16 |
| Right | Precentral sulcus (superior part)                                      | 2.34 | 0.16 | 2.39 | 0.17 | 2.84 | 0.16 |
| Left  | Inferior frontal sulcus                                                | 2.30 | 0.12 | 2.34 | 0.13 | 2.82 | 0.16 |
| Right | Inferior frontal gyrus (orbital part)                                  | 2.90 | 0.25 | 2.99 | 0.26 | 2.79 | 0.16 |
| Left  | Orbital sulci (H-shaped sulci)                                         | 2.62 | 0.21 | 2.70 | 0.23 | 2.76 | 0.15 |
| Right | Anterior transverse collateral sulcus                                  | 2.47 | 0.29 | 2.56 | 0.28 | 2.76 | 0.15 |
| Right | Lateral occipito-temporal gyrus (fusiform gyrus)                       | 2.77 | 0.17 | 2.83 | 0.17 | 2.72 | 0.15 |
| Right | Lateral orbital sulcus                                                 | 2.29 | 0.25 | 2.36 | 0.26 | 2.70 | 0.15 |
| Left  | Circular sulcus of the insula (inferior segment)                       | 2.77 | 0.18 | 2.81 | 0.18 | 2.66 | 0.15 |
| Right | Inferior temporal sulcus                                               | 2.50 | 0.18 | 2.56 | 0.17 | 2.65 | 0.15 |
| Right | Transverse temporal sulcus                                             | 2.50 | 0.29 | 2.57 | 0.29 | 2.63 | 0.15 |
| Right | Subcentral gyrus (central operculum) and sulci                         | 2.71 | 0.20 | 2.77 | 0.21 | 2.55 | 0.14 |
| Right | Middle frontal gyrus                                                   | 2.76 | 0.16 | 2.80 | 0.17 | 2.50 | 0.14 |
| Left  | Superior frontal gyrus                                                 | 2.94 | 0.16 | 2.99 | 0.19 | 2.49 | 0.14 |
| Left  | Posterior ramus of the lateral sulcus                                  | 2.4  | 0.16 | 2.42 | 0.16 | 2.47 | 0.14 |
| Left  | Straight gyrus, Gyrus rectus                                           | 2.75 | 0.18 | 2.80 | 0.20 | 2.46 | 0.14 |

|       |                                                                |      |      |      |      |      |      |
|-------|----------------------------------------------------------------|------|------|------|------|------|------|
| Right | Horizontal ramus of the anterior segment of the lateral sulcus | 2.29 | 0.23 | 2.36 | 0.23 | 2.42 | 0.14 |
| Left  | Anterior occipital sulcus and preoccipital notch               | 2.29 | 0.18 | 2.34 | 0.16 | 2.42 | 0.14 |
| Right | Parahippocampal gyrus                                          | 3.12 | 0.23 | 3.20 | 0.24 | 2.41 | 0.14 |
| Left  | Long insular gyrus and central sulcus of the insula            | 3.19 | 0.28 | 3.28 | 0.29 | 2.38 | 0.13 |
| Right | Supramarginal gyrus                                            | 2.84 | 0.18 | 2.89 | 0.17 | 2.36 | 0.13 |
| Left  | Suborbital sulcus                                              | 2.54 | 0.29 | 2.63 | 0.32 | 2.33 | 0.13 |
| Left  | Lateral orbital sulcus                                         | 2.28 | 0.29 | 2.39 | 0.31 | 2.29 | 0.13 |
| Right | Medial orbital sulcus (olfactory sulcus)                       | 2.21 | 0.19 | 2.25 | 0.21 | 2.27 | 0.13 |
| Right | Angular gyrus                                                  | 2.88 | 0.19 | 2.93 | 0.17 | 2.27 | 0.13 |
| Right | Anterior transverse temporal gyrus (of Heschl)                 | 2.49 | 0.21 | 2.55 | 0.22 | 2.24 | 0.13 |

Table S4. Regions of significant cortical thinning in treatment-resistant schizophrenia patients ranked by effect size

| Hemisphere | Region                                              | Patients |      | Controls |      | <i>t</i> -statistic | Effect size<br>(Cohen's <i>d</i> ) |
|------------|-----------------------------------------------------|----------|------|----------|------|---------------------|------------------------------------|
|            |                                                     | Mean     | SD   | Mean     | SD   |                     |                                    |
| Left       | Circular sulcus of the insula (superior segment)    | 2.47     | 0.15 | 2.64     | 0.14 | 7.34                | 0.74                               |
| Left       | Inferior occipital gyrus and sulcus                 | 2.29     | 0.16 | 2.46     | 0.15 | 6.03                | 0.61                               |
| Left       | Superior temporal sulcus                            | 2.39     | 0.11 | 2.49     | 0.10 | 6.02                | 0.60                               |
| Left       | Middle-anterior cingulate gyrus and sulcus          | 2.54     | 0.19 | 2.73     | 0.20 | 5.94                | 0.60                               |
| Right      | Circular sulcus of the insula (superior segment)    | 2.48     | 0.16 | 2.64     | 0.14 | 5.92                | 0.59                               |
| Right      | Circular sulcus of the insula (inferior segment)    | 2.60     | 0.17 | 2.80     | 0.23 | 5.87                | 0.59                               |
| Left       | Superior frontal gyrus                              | 2.72     | 0.17 | 2.88     | 0.15 | 5.70                | 0.57                               |
| Left       | Temporal pole                                       | 3.18     | 0.26 | 3.43     | 0.20 | 5.51                | 0.55                               |
| Left       | Inferior temporal gyrus                             | 2.80     | 0.16 | 2.97     | 0.18 | 5.39                | 0.54                               |
| Right      | Superior frontal gyrus                              | 2.66     | 0.16 | 2.81     | 0.14 | 5.31                | 0.53                               |
| Left       | Middle temporal gyrus                               | 2.97     | 0.18 | 3.12     | 0.14 | 5.29                | 0.53                               |
| Right      | Middle-anterior cingulate gyrus and sulcus          | 2.49     | 0.17 | 2.66     | 0.17 | 5.27                | 0.53                               |
| Right      | Middle temporal gyrus                               | 2.97     | 0.15 | 3.10     | 0.15 | 5.24                | 0.53                               |
| Left       | Inferior part of the precentral sulcus              | 2.34     | 0.17 | 2.47     | 0.12 | 5.10                | 0.51                               |
| Right      | Orbital sulci (H-shaped sulci)                      | 2.23     | 0.19 | 2.44     | 0.22 | 5.06                | 0.51                               |
| Left       | Inferior temporal sulcus                            | 2.40     | 0.18 | 2.56     | 0.15 | 5.06                | 0.51                               |
| Right      | Middle-posterior cingulate gyrus and sulcus         | 2.47     | 0.13 | 2.59     | 0.15 | 5.04                | 0.51                               |
| Left       | Inferior frontal gyrus (opercular part)             | 2.65     | 0.17 | 2.80     | 0.14 | 5.02                | 0.50                               |
| Right      | Superior temporal sulcus                            | 2.44     | 0.13 | 2.54     | 0.10 | 4.89                | 0.49                               |
| Right      | Long insular gyrus and central sulcus of the insula | 3.22     | 0.29 | 3.48     | 0.26 | 4.78                | 0.48                               |
| Right      | Inferior temporal sulcus                            | 2.47     | 0.17 | 2.62     | 0.16 | 4.76                | 0.48                               |
| Left       | Circular sulcus of the insula (anterior segment)    | 2.65     | 0.21 | 2.82     | 0.19 | 4.68                | 0.47                               |
| Right      | Inferior occipital gyrus and sulcus                 | 2.56     | 0.23 | 2.75     | 0.21 | 4.67                | 0.47                               |
| Right      | Posterior ramus of the lateral sulcus               | 2.45     | 0.17 | 2.57     | 0.15 | 4.58                | 0.46                               |
| Right      | Temporal pole                                       | 3.23     | 0.25 | 3.44     | 0.21 | 4.56                | 0.46                               |
| Left       | Middle-posterior cingulate gyrus and sulcus         | 2.48     | 0.16 | 2.59     | 0.17 | 4.56                | 0.46                               |
| Left       | Medial orbital sulcus (olfactory sulcus)            | 2.22     | 0.17 | 2.37     | 0.17 | 4.52                | 0.45                               |
| Left       | Lateral occipito-temporal gyrus (fusiform gyrus)    | 2.77     | 0.17 | 2.91     | 0.16 | 4.49                | 0.45                               |
| Left       | Intraparietal sulcus and transverse parietal sulci  | 2.03     | 0.11 | 2.13     | 0.11 | 4.49                | 0.45                               |
| Right      | Posterior-dorsal cingulate gyrus                    | 2.79     | 0.19 | 2.93     | 0.18 | 4.46                | 0.45                               |
| Left       | Parieto-occipital sulcus                            | 2.11     | 0.16 | 2.23     | 0.14 | 4.45                | 0.45                               |
| Left       | Circular sulcus of the insula                       | 2.74     | 0.20 | 2.89     | 0.21 | 4.43                | 0.45                               |

|       |                                                           |      |      |      |      |      |      |
|-------|-----------------------------------------------------------|------|------|------|------|------|------|
|       | (inferior segment)                                        |      |      |      |      |      |      |
| Left  | Medial occipito-temporal and lingual sulcus               | 2.39 | 0.19 | 2.52 | 0.15 | 4.32 | 0.43 |
| Left  | Middle frontal gyrus                                      | 2.53 | 0.15 | 2.65 | 0.15 | 4.24 | 0.43 |
| Left  | Precentral sulcus (superior part)                         | 2.33 | 0.14 | 2.44 | 0.14 | 4.15 | 0.42 |
| Right | Precentral sulcus (inferior part)                         | 2.28 | 0.16 | 2.39 | 0.14 | 4.13 | 0.41 |
| Left  | Posterior-dorsal cingulate gyrus                          | 2.82 | 0.21 | 2.96 | 0.19 | 4.12 | 0.41 |
| Right | Superior occipital sulcus and transverse occipital sulcus | 2.02 | 0.17 | 2.13 | 0.14 | 4.03 | 0.41 |
| Right | Anterior transverse collateral sulcus                     | 2.57 | 0.20 | 2.73 | 0.20 | 3.94 | 0.40 |
| Left  | Angular gyrus                                             | 2.54 | 0.15 | 2.65 | 0.17 | 3.90 | 0.39 |
| Left  | Anterior cingulate gyrus and sulcus                       | 2.55 | 0.16 | 2.67 | 0.18 | 3.86 | 0.39 |
| Left  | Superior occipital gyrus                                  | 2.06 | 0.19 | 2.19 | 0.18 | 3.81 | 0.38 |
| Right | Inferior temporal gyrus                                   | 2.89 | 0.20 | 3.01 | 0.16 | 3.74 | 0.38 |
| Left  | Middle occipital gyrus                                    | 2.47 | 0.18 | 2.59 | 0.14 | 3.73 | 0.37 |
| Left  | Lateral occipito-temporal sulcus                          | 2.39 | 0.23 | 2.53 | 0.15 | 3.72 | 0.37 |
| Left  | Subparietal sulcus                                        | 2.29 | 0.16 | 2.39 | 0.13 | 3.69 | 0.37 |
| Left  | Posterior ramus of the lateral sulcus                     | 2.36 | 0.17 | 2.47 | 0.19 | 3.63 | 0.36 |
| Left  | Supramarginal gyrus                                       | 2.64 | 0.16 | 2.74 | 0.16 | 3.62 | 0.36 |
| Left  | Superior temporal gyrus (planum temporale)                | 2.52 | 0.20 | 2.64 | 0.14 | 3.61 | 0.36 |
| Right | Superior frontal sulcus                                   | 2.21 | 0.14 | 2.31 | 0.15 | 3.57 | 0.36 |
| Right | Lateral occipito-temporal sulcus                          | 2.53 | 0.18 | 2.65 | 0.17 | 3.54 | 0.36 |
| Left  | Long insular gyrus and central sulcus of the insula       | 3.14 | 0.24 | 3.27 | 0.18 | 3.51 | 0.35 |
| Left  | Superior occipital sulcus and transverse occipital sulcus | 1.98 | 0.17 | 2.08 | 0.16 | 3.50 | 0.35 |
| Left  | Sulcus intermedius primus (of Jensen)                     | 2.20 | 0.33 | 2.42 | 0.36 | 3.50 | 0.35 |
| Right | Parieto-occipital sulcus                                  | 2.18 | 0.18 | 2.28 | 0.14 | 3.47 | 0.35 |
| Left  | Paracentral lobule and sulcus                             | 2.26 | 0.15 | 2.37 | 0.19 | 3.44 | 0.35 |
| Left  | Posterior transverse collateral sulcus                    | 1.97 | 0.27 | 2.15 | 0.23 | 3.43 | 0.34 |
| Right | Precentral sulcus (superior part)                         | 2.29 | 0.17 | 2.40 | 0.15 | 3.42 | 0.34 |
| Left  | Postcentral sulcus                                        | 2.05 | 0.13 | 2.15 | 0.14 | 3.36 | 0.34 |
| Left  | Middle occipital sulcus and lunatus sulcus                | 1.92 | 0.18 | 2.04 | 0.18 | 3.31 | 0.33 |
| Left  | Precuneus                                                 | 2.42 | 0.17 | 2.52 | 0.15 | 3.31 | 0.33 |
| Right | Lateral occipito-temporal gyrus (fusiform gyrus)          | 2.85 | 0.19 | 2.96 | 0.16 | 3.29 | 0.33 |
| Left  | Anterior transverse collateral sulcus                     | 2.63 | 0.29 | 2.81 | 0.27 | 3.27 | 0.33 |
| Left  | Orbital sulci (H-shaped sulci)                            | 2.49 | 0.18 | 2.62 | 0.21 | 3.26 | 0.33 |
| Left  | Precentral gyrus                                          | 2.79 | 0.19 | 2.89 | 0.13 | 3.26 | 0.33 |
| Right | Superior temporal gyrus (planum temporale)                | 2.51 | 0.18 | 2.61 | 0.17 | 3.26 | 0.33 |
| Left  | Anterior occipital sulcus and preoccipital notch          | 2.15 | 0.17 | 2.27 | 0.17 | 3.26 | 0.33 |
| Right | Intraparietal sulcus and transverse parietal sulci        | 2.05 | 0.14 | 2.13 | 0.12 | 3.23 | 0.32 |
| Right | Middle frontal gyrus                                      | 2.45 | 0.13 | 2.53 | 0.13 | 3.21 | 0.32 |

|       |                                                                    |      |      |      |      |      |      |
|-------|--------------------------------------------------------------------|------|------|------|------|------|------|
| Right | Supramarginal gyrus                                                | 2.66 | 0.15 | 2.75 | 0.16 | 3.18 | 0.32 |
| Left  | Superior frontal sulcus                                            | 2.33 | 0.17 | 2.41 | 0.11 | 3.12 | 0.31 |
| Left  | Short insular gyri                                                 | 3.50 | 0.20 | 3.61 | 0.19 | 3.09 | 0.31 |
| Right | Parahippocampal gyrus                                              | 3.07 | 0.27 | 3.25 | 0.31 | 3.07 | 0.31 |
| Right | Middle occipital gyrus                                             | 2.57 | 0.17 | 2.65 | 0.14 | 3.05 | 0.31 |
| Right | Precentral gyrus                                                   | 2.70 | 0.21 | 2.81 | 0.16 | 3.03 | 0.30 |
| Left  | Occipital pole                                                     | 1.96 | 0.16 | 2.04 | 0.14 | 3.02 | 0.30 |
| Left  | Superior temporal gyrus (planum polare)                            | 3.31 | 0.23 | 3.44 | 0.26 | 3.02 | 0.30 |
| Right | Orbital gyri                                                       | 2.59 | 0.17 | 2.69 | 0.14 | 2.97 | 0.30 |
| Left  | Orbital gyri                                                       | 2.61 | 0.17 | 2.69 | 0.12 | 2.90 | 0.29 |
| Right | Inferior frontal gyrus (opercular part)                            | 2.66 | 0.15 | 2.74 | 0.16 | 2.89 | 0.29 |
| Right | Precuneus                                                          | 2.42 | 0.15 | 2.49 | 0.14 | 2.88 | 0.29 |
| Right | Short insular gyri                                                 | 3.45 | 0.23 | 3.57 | 0.20 | 2.88 | 0.29 |
| Right | Subparietal sulcus                                                 | 2.33 | 0.16 | 2.41 | 0.14 | 2.87 | 0.29 |
| Left  | Parahippocampal gyrus                                              | 3.02 | 0.30 | 3.17 | 0.27 | 2.86 | 0.29 |
| Right | Middle occipital sulcus and lunatus sulcus                         | 2.06 | 0.19 | 2.15 | 0.17 | 2.83 | 0.28 |
| Right | Inferior frontal sulcus                                            | 2.04 | 0.13 | 2.10 | 0.13 | 2.79 | 0.28 |
| Right | Anterior occipital sulcus and preoccipital notch                   | 2.34 | 0.18 | 2.42 | 0.15 | 2.73 | 0.27 |
| Right | Superior temporal gyrus (lateral aspect)                           | 3.02 | 0.20 | 3.11 | 0.17 | 2.71 | 0.27 |
| Left  | Inferior frontal gyrus (orbital part)                              | 2.67 | 0.21 | 2.78 | 0.25 | 2.67 | 0.27 |
| Right | Angular gyrus                                                      | 2.63 | 0.16 | 2.70 | 0.15 | 2.66 | 0.27 |
| Right | Medial occipito-temporal sulcus and lingual sulcus                 | 2.45 | 0.17 | 2.53 | 0.16 | 2.66 | 0.27 |
| Right | Calcarine sulcus                                                   | 1.87 | 0.14 | 1.94 | 0.15 | 2.65 | 0.27 |
| Right | Inferior frontal gyrus (triangular part)                           | 2.49 | 0.16 | 2.57 | 0.17 | 2.64 | 0.27 |
| Left  | Inferior frontal gyrus (triangular part)                           | 2.57 | 0.19 | 2.66 | 0.18 | 2.62 | 0.26 |
| Left  | Horizontal ramus of the anterior segment of the lateral sulcus     | 2.16 | 0.27 | 2.30 | 0.28 | 2.60 | 0.26 |
| Right | Posterior-ventral cingulate gyrus (isthmus of the cingulate gyrus) | 2.72 | 0.29 | 2.86 | 0.28 | 2.57 | 0.26 |
| Left  | Subcentral gyrus and sulci                                         | 2.66 | 0.21 | 2.75 | 0.19 | 2.49 | 0.25 |
| Right | Posterior transverse collateral sulcus                             | 2.13 | 0.25 | 2.23 | 0.18 | 2.48 | 0.25 |
| Left  | Lingual gyrus                                                      | 1.95 | 0.14 | 2.01 | 0.13 | 2.44 | 0.24 |
| Left  | Superior parietal lobule                                           | 2.29 | 0.17 | 2.35 | 0.12 | 2.38 | 0.24 |
| Right | Superior temporal gyrus (planum polare)                            | 3.20 | 0.24 | 3.31 | 0.28 | 2.38 | 0.24 |
| Right | Anterior cingulate gyrus and sulcus                                | 2.32 | 0.17 | 2.40 | 0.19 | 2.32 | 0.23 |
| Left  | Anterior transverse temporal gyrus (of Heschl)                     | 2.42 | 0.24 | 2.51 | 0.22 | 2.21 | 0.22 |
| Left  | Inferior frontal sulcus                                            | 2.17 | 0.15 | 2.23 | 0.15 | 2.20 | 0.22 |
| Right | Inferior frontal gyrus (orbital part)                              | 2.61 | 0.21 | 2.71 | 0.22 | 2.18 | 0.22 |
| Left  | Superior temporal gyrus (lateral aspect)                           | 3.07 | 0.20 | 3.15 | 0.19 | 2.17 | 0.22 |

---

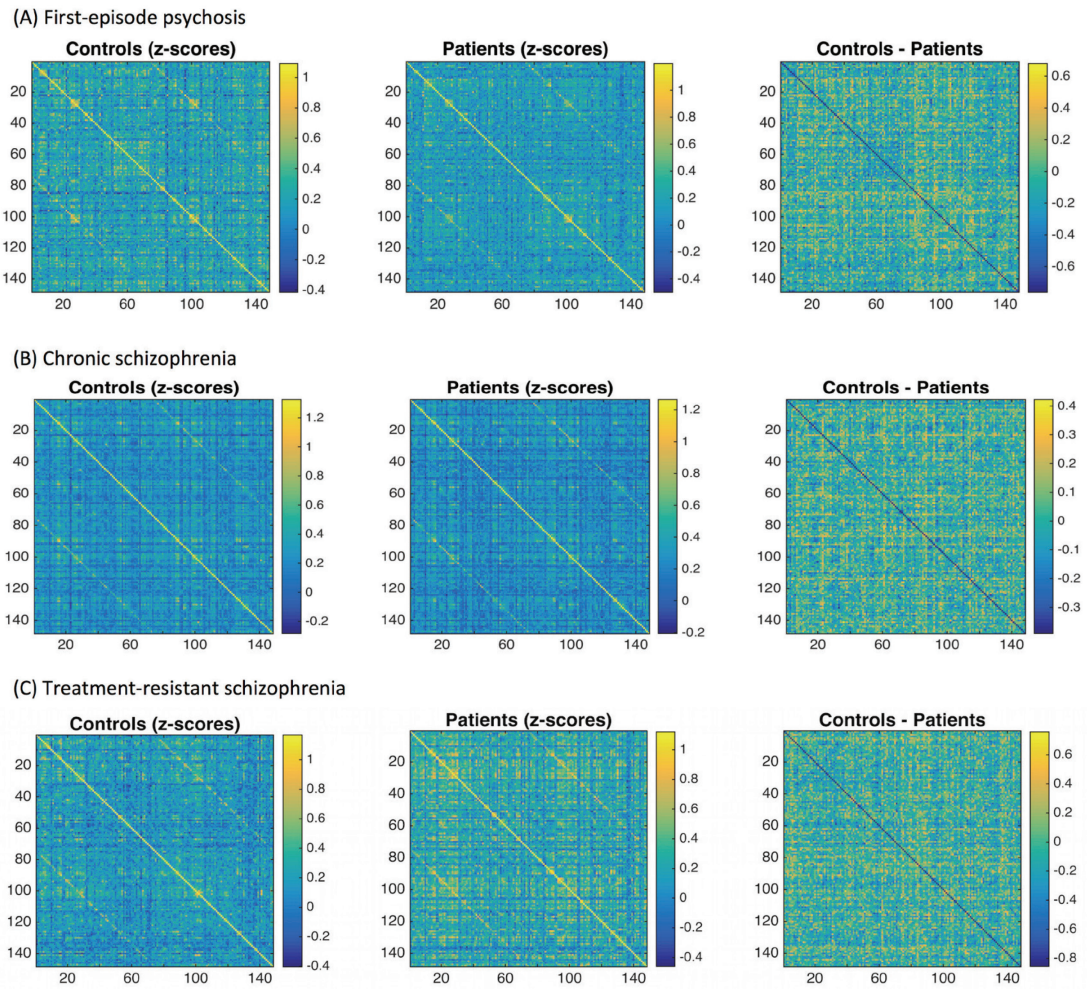

Figure S1. Cortical thickness connectivity matrices for patients and respective healthy controls groups in three cohorts: (A) first-episode psychosis, (B) chronic schizophrenia, and (C) treatment-resistant schizophrenia.



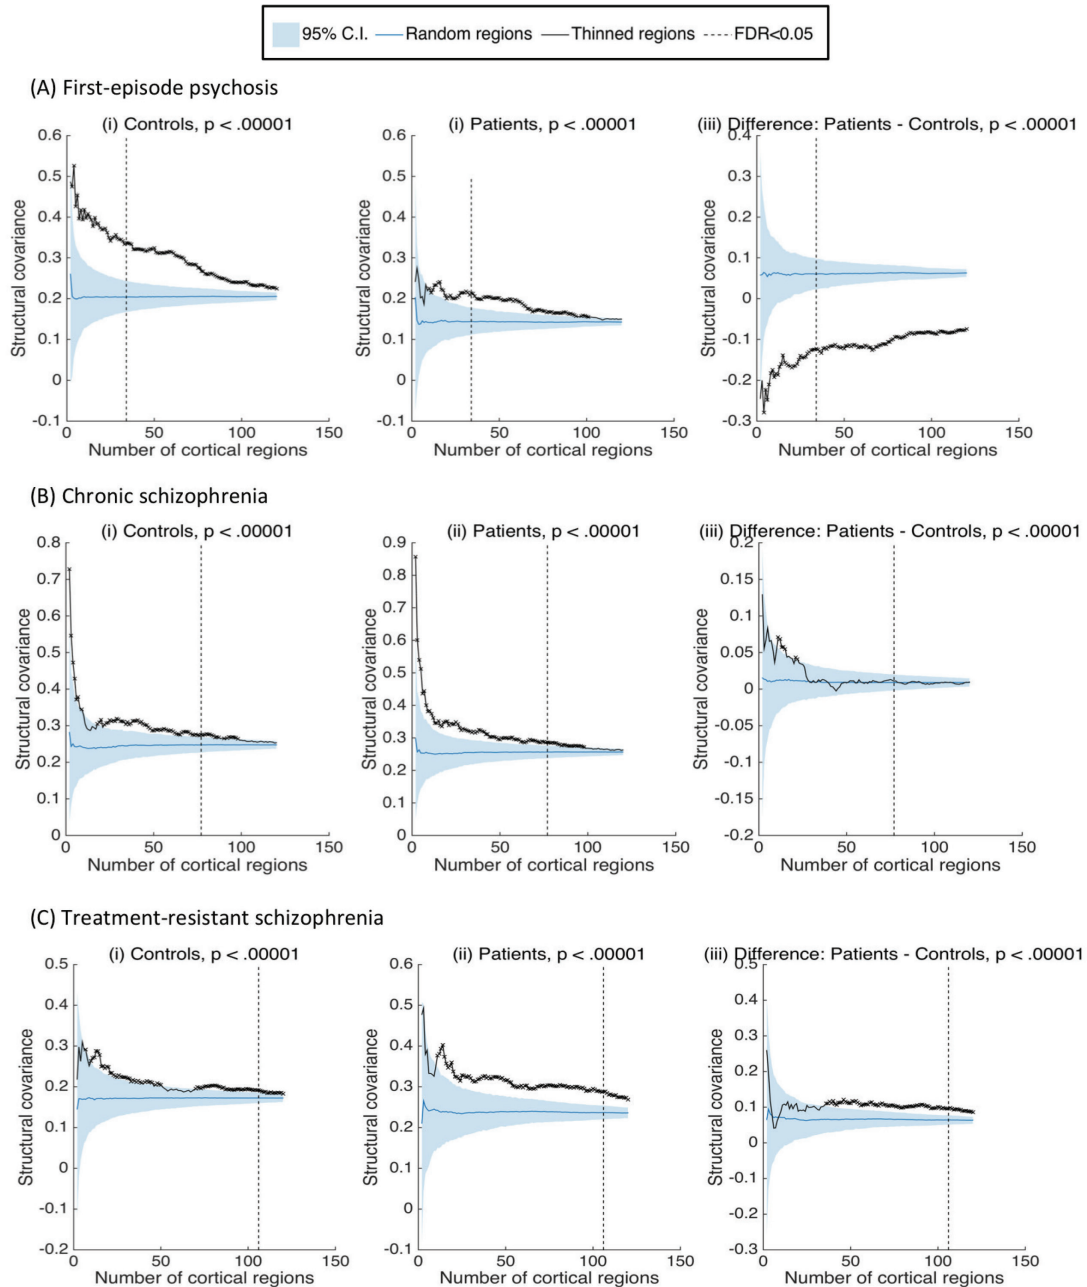

Figure S2. Comparison of the average structural covariance between the top- $n$  cortical regions with cortical thickness reductions (CTRs) in (A) first-episode psychosis, (B) chronic schizophrenia, and (C) treatment-resistant schizophrenia patients with the average structural covariance in 5,000 randomly chosen sets of  $n$  regions, which were matched to the number of nodes within each cerebral hemisphere and the total Euclidean distance between pairs of nodes. Comparisons are shown separately for (i) healthy controls, (ii) patients and (iii) between-group difference. The vertical axis shows structural covariance, which is a  $r$ -to- $z$ -transformed Pearson correlation coefficient. Dashed vertical lines represent the boundary between regions with and without CTRs based on a false discovery rate threshold of 5%. Values of  $n$  marked with a cross indicate that structural covariance was significantly increased between the top- $n$  regions with the most extensive CTRs ( $p < 0.05$ ). Solid black line is the mean structural covariance in the actual (non-permuted) data. Blue line is the mean structural covariance in the randomized data, averaged across 5000 randomizations. The shaded area denotes 95% confidence intervals across the 5000 randomizations.

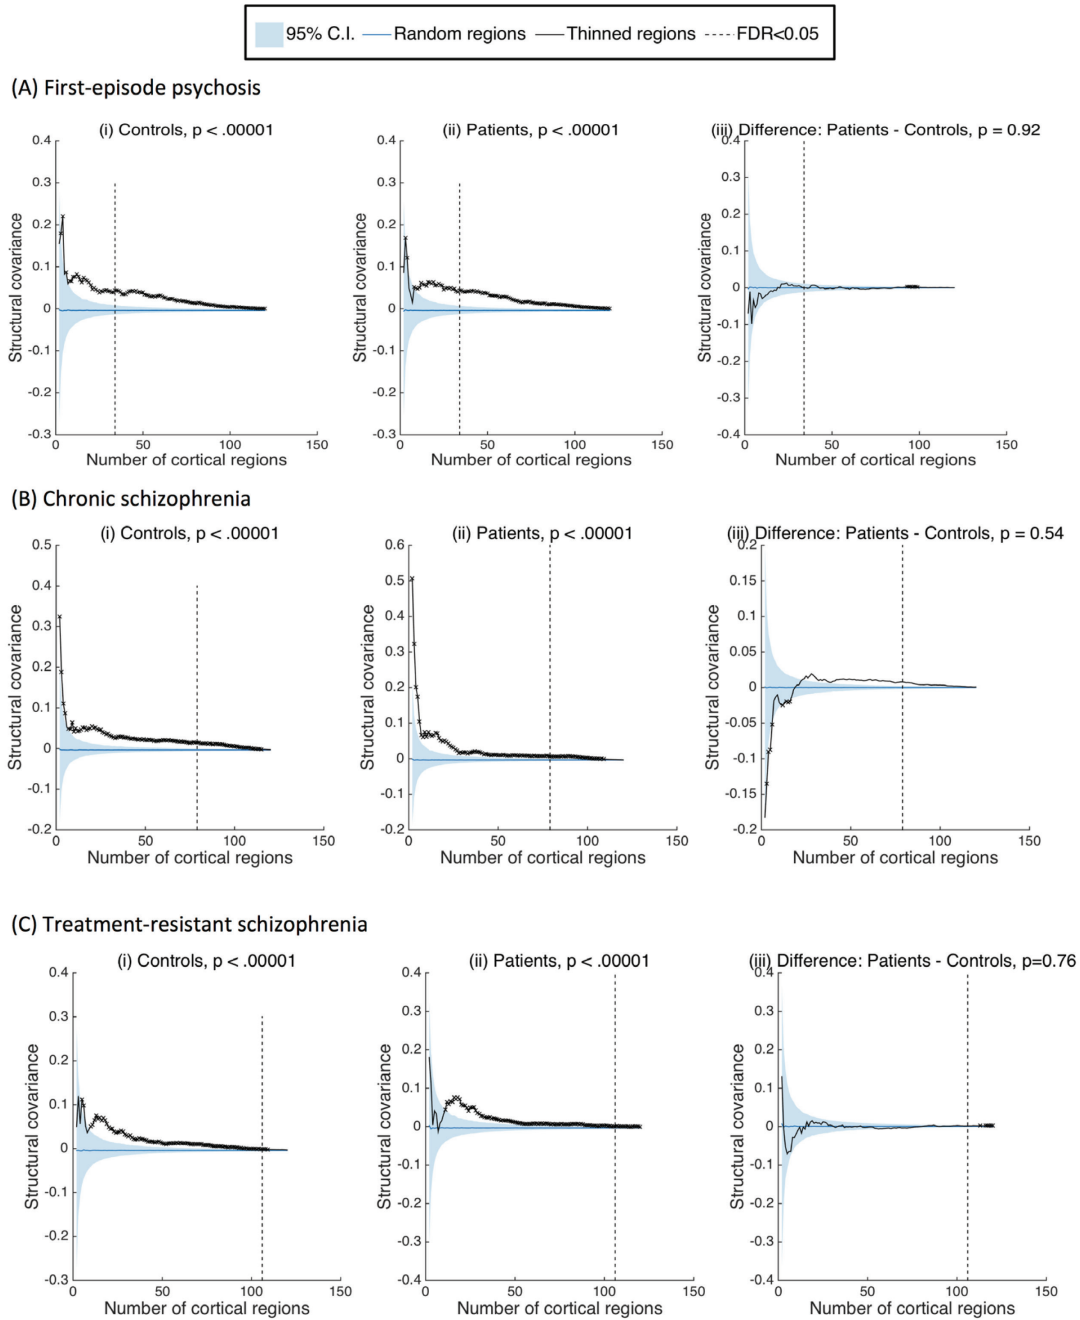

Figure S3. Comparison of the average structural covariance between the top- $n$  cortical regions with cortical thickness reductions (CTRs) in (A) first-episode psychosis, (B) chronic schizophrenia, and (C) treatment-resistant schizophrenia patients with the average structural covariance in 5,000 randomly chosen sets of  $n$  regions, when mean cortical thickness is included as a covariate. Comparisons are shown separately for (i) healthy controls, (ii) patients and (iii) between-group difference. The vertical axis shows structural covariance, which is a r-to-z-transformed Pearson correlation coefficient. Dashed vertical lines represent the boundary between regions with and without CTRs based on a false discovery rate threshold of 5%. Values of  $n$  marked with a cross indicate that structural covariance was significantly increased between the top- $n$  regions with the most extensive CTRs ( $p < 0.05$ ). Solid black line is the mean structural covariance in the actual (non-permuted) data. Blue line is the mean structural covariance in the randomized data, averaged across 5000 randomizations. The shaded area denotes 95% confidence intervals across the 5000 randomizations.



Table S5. Structural covariance between regions with significant thinning in at least two of three schizophrenia cohorts. A total of 81 regions (55%) showed significant cortical thickness reductions in at least two of the three cohorts. The probability of this degree of overlap occurring as a matter of chance was remote ( $p=0.006$ ). Structural covariance was significantly increased among these 81 regions compared to randomly selected sets of 81 regions in both patients and controls for all three cohorts ( $p<0.05$ ).

|                   | <i>First-episode psychosis</i> |            |                | <i>Chronic schizophrenia</i> |           |                | <i>Treatment-resistant schizophrenia</i> |           |                |
|-------------------|--------------------------------|------------|----------------|------------------------------|-----------|----------------|------------------------------------------|-----------|----------------|
|                   | <i>SC</i>                      | <i>SC</i>  | <i>p-value</i> | <i>SC</i>                    | <i>SC</i> | <i>p-value</i> | <i>SC</i>                                | <i>SC</i> | <i>p-value</i> |
|                   | <i>Null</i>                    |            |                | <i>Null</i>                  |           |                | <i>Null</i>                              |           |                |
| <b>Controls</b>   | 0.27                           | 0.20±0.02  | <0.001         | 0.30                         | 0.25±0.02 | <0.001         | 0.18                                     | 0.15±0.02 | 0.02           |
| <b>Patients</b>   | 0.19                           | 0.14±0.02  | <0.001         | 0.31                         | 0.18±0.02 | <0.001         | 0.30                                     | 0.23±0.02 | <0.001         |
| <b>Difference</b> | -0.08                          | -0.06±0.02 | 0.02           | 0.01                         | 0.01±0.01 | 0.7            | 0.13                                     | 0.08±0.01 | <0.001         |

**SC**: structural covariance between 81 cortical regions with significant thinning in at least two of the three cohorts; **SC null**: structural covariance among randomly chosen sets of 81 regions; **Difference**: between-group difference of patients minus controls.

Table S6: Structural covariance between regions with CTRs in randomly selected subsamples of the chronic schizophrenia cohort. Full sample of patients (N=153) and healthy controls (N=168) was reduced to five randomly selected subsamples with the same number of patients (N=47) and controls (N=54) as the smallest cohort (TRS) by sample size. Effects are consistent across the full sample and the five subsamples, except for Subsample 4, where structural covariance was no longer significantly increased in the control group among CTR regions. In all cases, structural covariance was computed among the 81 regions with significant cortical thickness reductions in at least two of the three cohorts.

|                    | <i>SC Controls</i> | <i>SC Patients</i> | <i>Difference</i> |
|--------------------|--------------------|--------------------|-------------------|
| <i>Full sample</i> | 0.30, $p<0.001$    | 0.31, $p<0.001$    | 0.01, $p=0.7$     |
| <i>Subsample 1</i> | 0.30, $p<0.001$    | 0.35, $p<0.001$    | 0.05, $p=0.4$     |
| <i>Subsample 2</i> | 0.28, $p<0.001$    | 0.32, $p<0.001$    | 0.04, $p=0.1$     |
| <i>Subsample 3</i> | 0.34, $p<0.001$    | 0.36, $p<0.001$    | 0.02, $p=0.9$     |
| <i>Subsample 4</i> | 0.20, $p=0.1$      | 0.34, $p<0.001$    | 0.14, $p=0.02$    |
| <i>Subsample 5</i> | 0.30, $p<0.001$    | 0.35, $p<0.007$    | 0.05, $p=0.2$     |

**SC**: structural covariance, **p**: p-value assessing whether structural covariance was increased among the 81 regions with CTRs, compared to the structural covariance between randomly chosen sets of 81 regions.

## References

1. American Psychiatric Association: Diagnostic and Statistical Manual of Mental Disorders. 3rd ed., r. Washington, DC, American Psychiatric Association, 1987
2. McGorry PD, Copolov DL, Singh BS: Royal park multidagnostic instrument for psychosis: Part I. Rationale and review. *Schizophr Bull* 1990; 16:501–515
3. First M, Spitzer R, Gibbon M, et al.: Structured Clinical Interview for DSM-IV-TR Axis I Disorders, Research Version, Patient Edition. New York, NY, New York State Psychiatric Institute, 2002
4. Henry LP, Harris MG, Amminger GP, et al.: Early Psychosis Prevention and Intervention Centre long-term follow-up study of first-episode psychosis: methodology and baseline characteristics. *Early Interv Psychiatry* 2007; 1:49–60
5. Wechsler D: Wechsler Adult Intelligence Scale-Revised Manual. New York, NY, The Psychological Corporation, 1981
6. Nelson HE, Willison JR: Restandardisation of the NART against the WAIS-R, in Nelson HE, editor National Adult Reading Test (NART) Test Manual. Windsor, NFER-Nelson, 1991, pp 13–23.
7. Loughland C, Draganic D, McCabe K, et al.: The Australian Schizophrenia Research Bank (ASRB): Quality assurance and control for a comprehensive clinical, neuropsychological, genetic and neuroimaging database for researchers [Internet]. *Aust N Z J Psychiatry* 2010; 44:1029–1035 Available from:  
<http://www.embase.com/search/results?subaction=viewrecord&from=export&id=L70132324%5Cnhttp://dx.doi.org/10.1016/j.schres.2010.02.269%5Cnhttp://sfx.library.uu.nl/utrecht?sid=EMBASE&issn=09209964&id=doi:10.1016%2Fj.schres.2010.02.269&atitle=The+Australian+S>
8. Castle DJ, Jablensky A, McGrath JJ, et al.: The diagnostic interview for psychoses (DIP): development, reliability and applications. [Internet]. *Psychol Med* 2005; 36:69–80 Available from:  
<http://eutils.ncbi.nlm.nih.gov/entrez/eutils/elink.fcgi?dbfrom=pubmed&id=16194284&retmode=ref&cmd=prlinks%5Cnpapers3://publication/doi/10.1017/S0033291705005969>
9. Kane J, Honigfeld G, Singer J, et al.: Clozapine for the treatment resistant schizophrenic. *Arch Gen Psychiatry* 1988; 45:789–796
10. Suzuki T, Remington G, Mulsant BH, et al.: Defining treatment-resistant schizophrenia and response to antipsychotics: a review and recommendation. [Internet]. *Psychiatry Res* 2012; 197:1–6 [cited 2016 May 13] Available from:  
<http://www.sciencedirect.com/science/article/pii/S0165178112000935>
11. Sheehan D V, Lecrubier MD, Sheehan KH, et al.: The Mini-International Neuropsychiatric Interview (M.I.N.I.): The Development and Validation of a Structured Diagnostic Psychiatric Interview for DSM-IV and ICD-10. *J Clin Psychiatry* 1998; 59:22–33
12. Wechsler D: Wechsler Adult Intelligence Scale, Third ed. San Antonio, The Psychological Corporation, 1997
13. Wechsler D: Wechsler Test of Adult Reading (WTAR). San Antonio, The Psychological Corporation (Harcourt Assessment), 2001
14. Andreasen NC: Scale for the Assessment of Negative Symptoms. Iowa City, University of Iowa, 1983
15. Kay S, Fiszbein A, Opler L: The positive and negative syndrome scale (PANSS) for schizophrenia. *Schizophr Bull* 1987; 13:261–267
